# Supplementary material for: Novel thiosemicarbazone UV-vis chemosensor for dual pH-orthogonal detection of Fe 3+ and Ag +
Source: Royal Society of Chemistry journal article supplement (doi:10.1039/d5ra07794j), 2026-01-01
Supplement: d5ra07794j1.pdf [file d5ra07794j1.pdf]

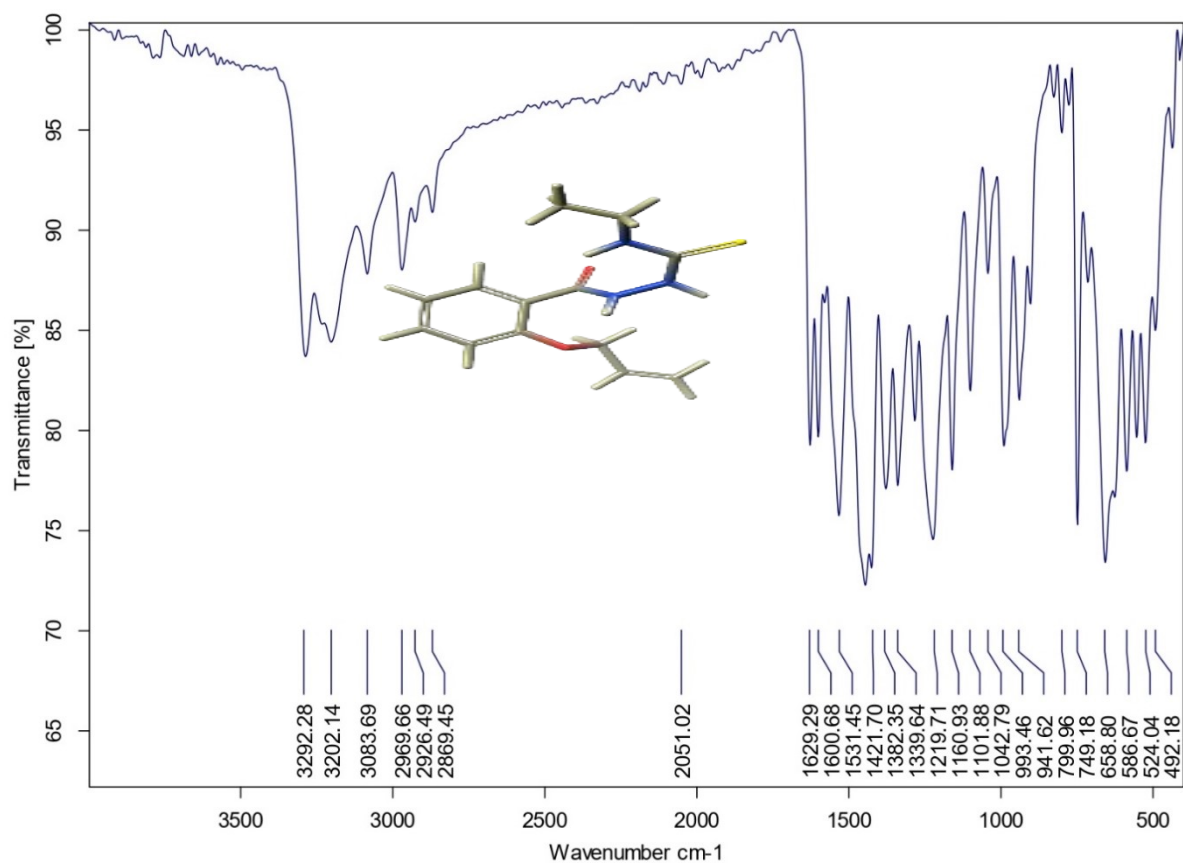

**Figure S1 FTIR spectra of S3 Ligand**

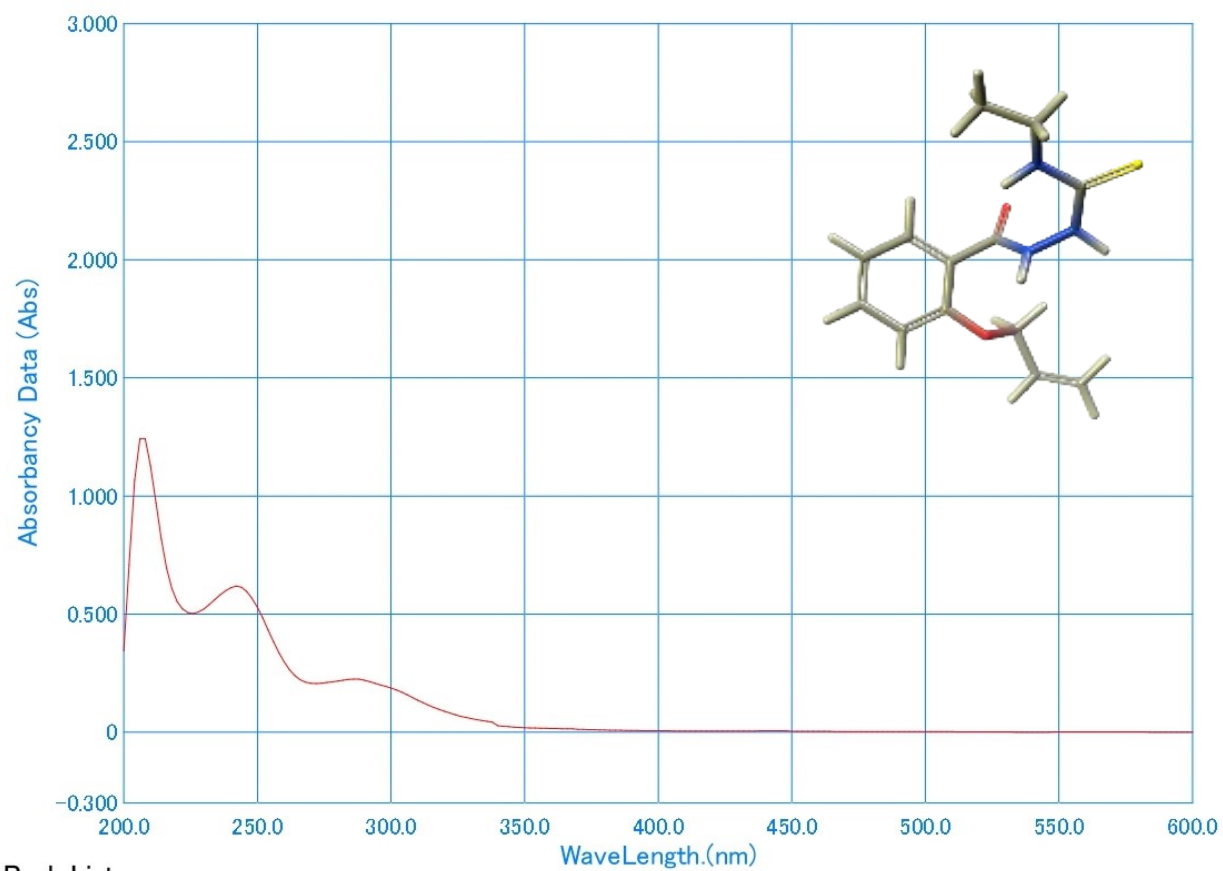

#### Peak List

| No.                            | Wavelength(nm) | Abs   | Trans(%T) |
|--------------------------------|----------------|-------|-----------|
| No Peak Data!                  |                |       |           |
| Max Record 200.0 nm – 600.0 nm |                |       |           |
| No.                            | Wavelength(nm) | Abs   | Trans(%T) |
| 1                              | 208.0          | 1.154 | 7.0       |

**Figure S2 UV-Vis spectra of S3 Ligand**

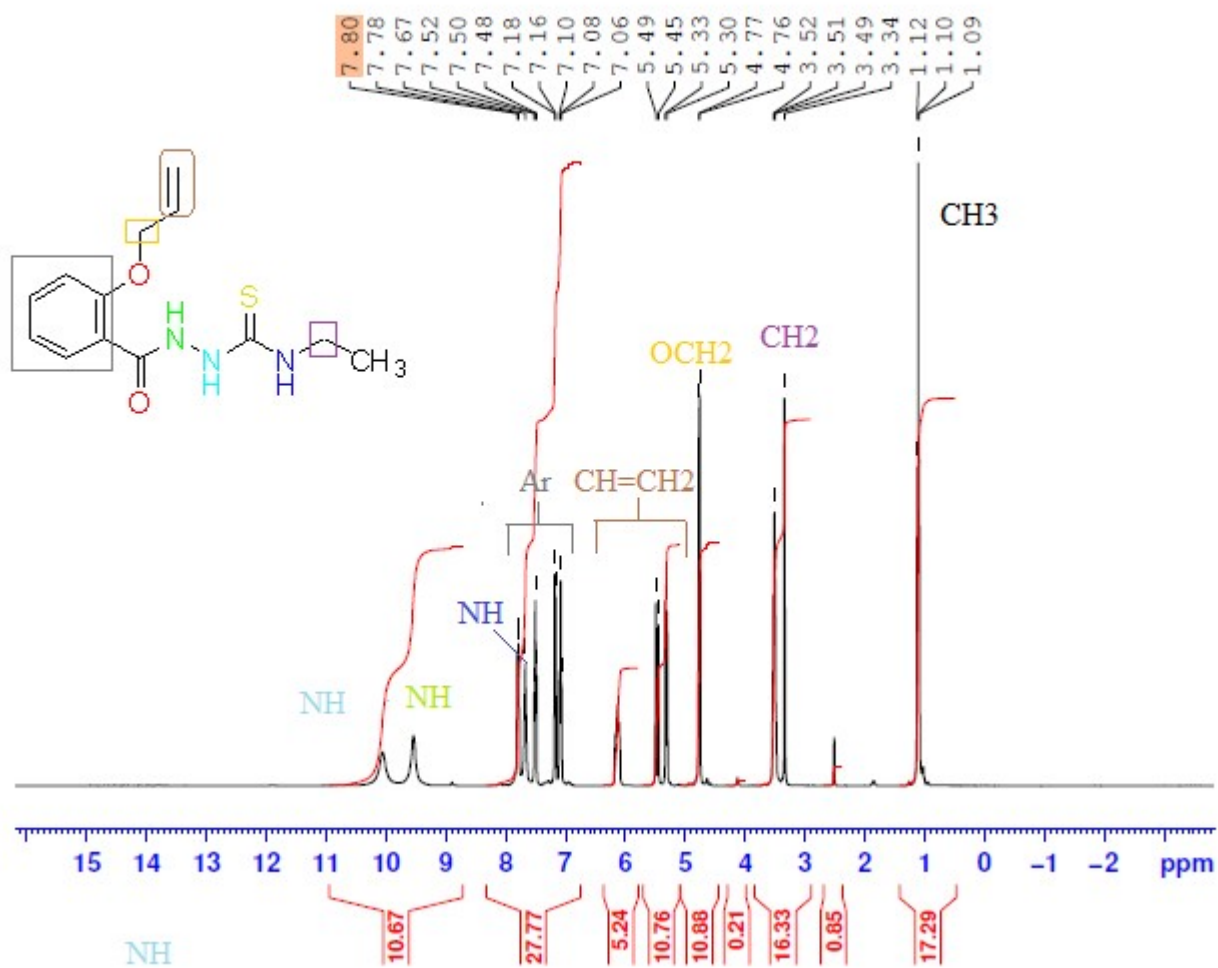

Figure S3 NMR spectra of S3 ligand

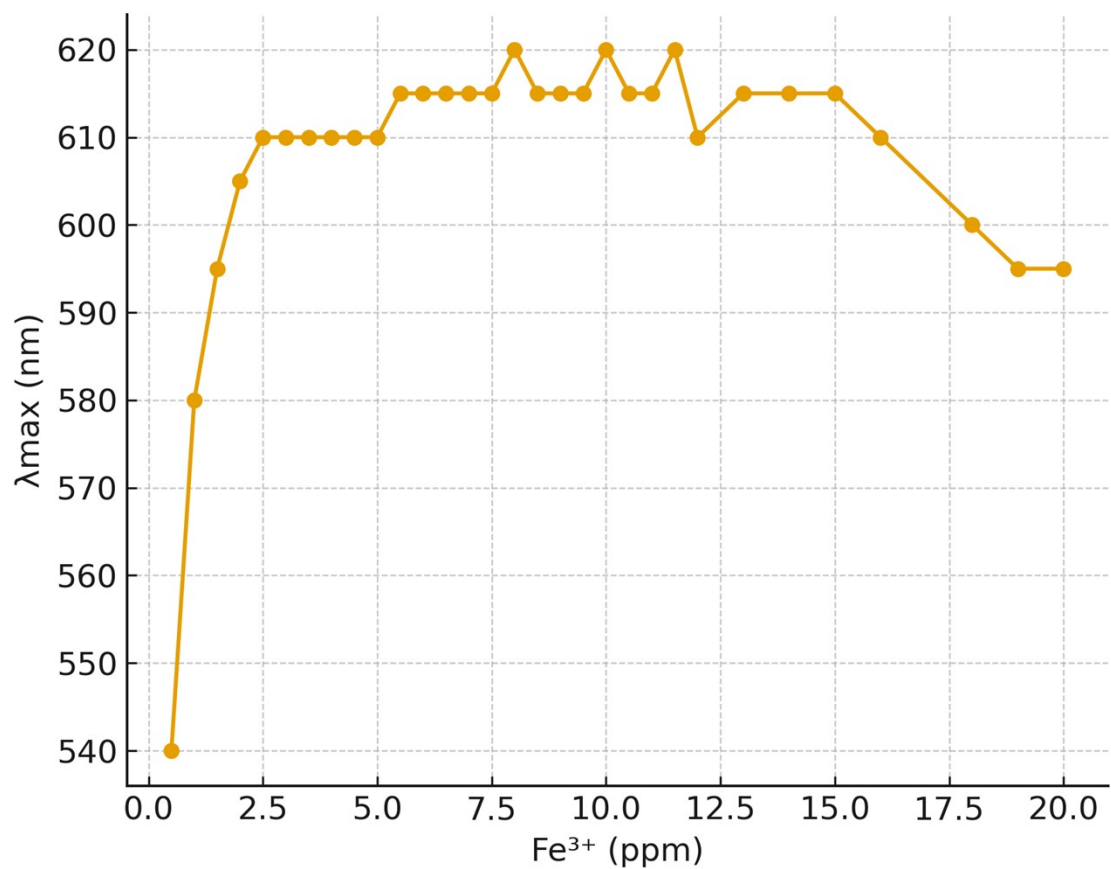

**Figure S4 Bathochromic shift of the visible band (450–650 nm) as  $\text{Fe}^{3+}$  increases. The progressive red shift toward ~620 nm reflects strengthening LMCT character as  $\text{Fe}^{3+}$  coordination saturates.**

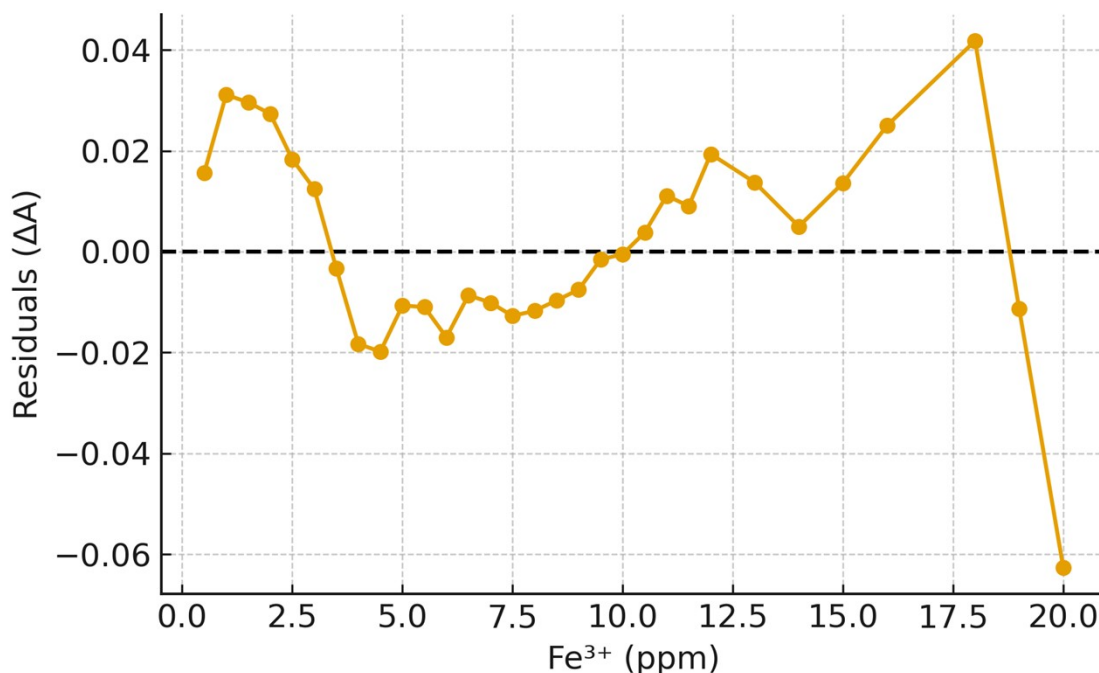

**Figure S 5: Residuals vs Fe<sup>3+</sup> concentration for the Hill model.** The plot shows the difference between observed and fitted values (residuals) from a nonlinear regression analysis of Fe<sup>3+</sup> titration data. The residuals are represented as orange dots, and the dashed line indicates zero residuals, which highlights the fit quality.

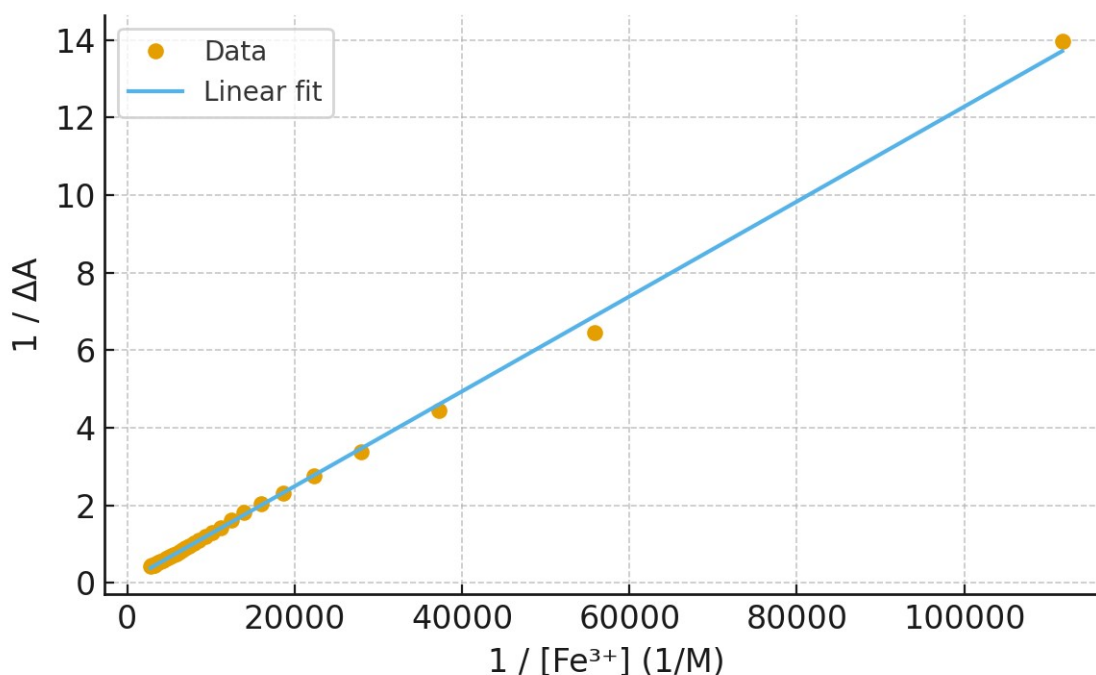

**Figure S 6 Benesi–Hildebrand linearization of the calibration region ( $\leq 10$  ppm) assuming a 1:1 equilibrium:**  $1/\Delta A = 1/A_{\text{max}} + (1/(K A_{\text{max}})) (1/[M])$ . The fit gives  $A_{\text{max}} \approx 40.9$  a.u.,  $K \approx 5.0 \times 10^{-3} \text{ M}^{-1}$ ,  $R^2 = 0.9985$ . The apparent  $K$  is inconsistent with the non-linear global fits ( $\approx 10^3 \text{ M}^{-1}$ ), underscoring the known sensitivity of BH plots to baseline error and slight deviations from strict 1:1 behavior. We therefore report Hill/1:1 non-linear parameters in the main text and include BH in the SI for completeness.

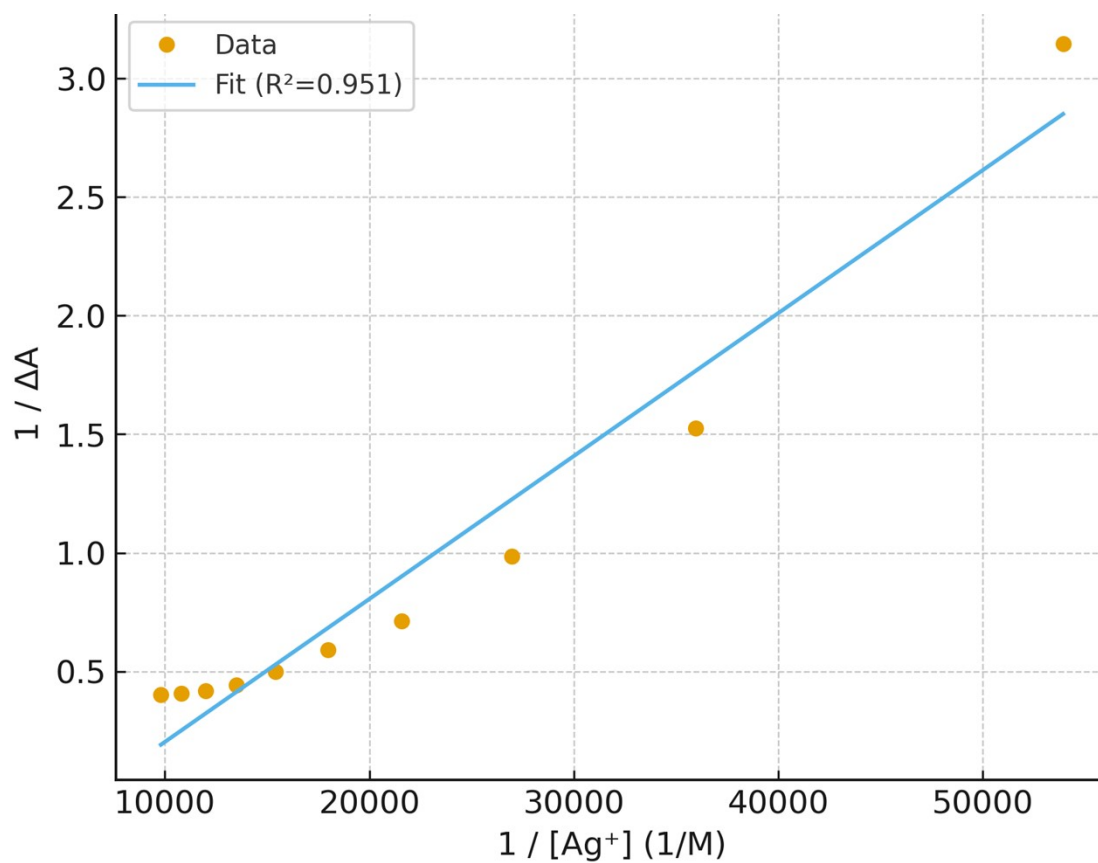

**Figure S 7 Benesi–Hildebrand linearization of the  $\text{Ag}^+$ –S3 binding equilibrium at pH 4. The plot of  $1/\Delta A$  vs.  $1/[\text{Ag}^+]$  yields a straight line ( $R^2 = 0.951$ ), consistent with a 1:1 complexation model and allowing estimation of the binding constant.**
